# Supplementary material
Source: MDPI journal article supplement (https://www.mdpi.com/2073-4441/14/9/1505)
Supplement: s1 [file s1 › water-1665021-supplementary.pdf]

## Supporting information (SI)

### Electrode microbial communities associated with electron do-nor source types in a bioelectrochemical system treating azo-dye wastewater

Ze-Chong Guo <sup>a, b</sup>, Lu Zhang <sup>a</sup>, Min-Hua Cui <sup>b, c, \*</sup>, Ai-Jie Wang <sup>b, d, \*</sup>

<sup>a</sup> School of Environmental and Chemical Engineering, Jiangsu University of Science and Technology, Zhenjiang 212100, P.R. China

<sup>b</sup> State Key Laboratory of Urban Water Resource and Environment, Harbin Institute of Technology, Harbin 150090, P.R. China

<sup>c</sup> School of Environmental and Civil Engineering, Jiangnan University, Wuxi 214122, P.R. China

<sup>d</sup> Key Laboratory of Environmental Biotechnology, Research Center for Eco-Environmental Sciences, Chinese Academy of Sciences, Beijing 100085, P.R. China

\* Corresponding author

School of Environmental and Civil Engineering, Jiangnan University, Wuxi 214122, PR China (Min-Hua Cui, [cuiminhua@jiangnan.edu.cn](mailto:cuiminhua@jiangnan.edu.cn))

Research Center for Eco-Environmental Sciences, Chinese Academy of Sciences, Beijing 100085, PR China. (Ai-Jie Wang, [waj0578@hit.edu.cn](mailto:waj0578@hit.edu.cn))

## **Table and Figure Chapter**

**Table S1** Comparison of dominant genera fed with various electron donor sources

**Table S1** Comparison of dominant genera fed with various electron donor sources

| Operational mode | Performance                                                                            | Electron donor      | Dominant genera                                                                 | References |
|------------------|----------------------------------------------------------------------------------------|---------------------|---------------------------------------------------------------------------------|------------|
| MFC              | 212.4±29.2 mW/m <sup>2</sup> @ carbon brush electrode                                  | Starch              | <i>Paenibacillus lautus</i> EB1                                                 | [42]       |
| Potentiostat     | 0.55mA/cm <sup>2</sup> with a Coulombic efficiency of 71.4%                            | Brewery wastewater  | <i>Geobacter</i> spp.                                                           | [43]       |
| MEC              | Decolorization efficiency of 94.62 ± 0.63% and COD removal efficiency of 89.12 ± 0.32% | Glucose             | <i>Raoultella</i> , <i>Shinella</i> , <i>Comamonas</i> , and <i>Pseudomonas</i> | [44]       |
| MEC              | Phenol removal rate and COD removal efficiency increased by 2.6 and 2.1-fold           | Phenol              | <i>Geobacter</i> , <i>Pseudomonas</i> and <i>Comamonadaceae</i> _               | [45]       |
| MEC              | Azo dye AO7 decolorization efficiency over 98%                                         | Domestic wastewater | <i>Desulfovibrio</i>                                                            | This study |
|                  |                                                                                        | Glucose             | <i>Acinetobacter</i>                                                            |            |
|                  |                                                                                        | Acetate             | <i>Klebsiella</i>                                                               |            |

## References

42. Yu, Y.-Y.; Zhen, S.-H.; Chao, S.-L.; Wu, J.; Cheng, L.; Li, S.-W.; Xiao, X.; Zhou, X. Electrochemistry of newly isolated Gram-positive bacteria *Paenibacillus lautus* with starch as sole carbon source. *Electrochim. Acta* **2022**, *411*, 140068. <https://doi.org/10.1016/j.electacta.2022.140068>.
43. Mai, Q.; Yang, G.; Cao, J.; Zhang, X.; Zhuang, L. Stratified microbial structure and activity within anode biofilm during electrochemically assisted brewery wastewater treatment. *Biotechnol. Bioeng.* **2020**, *117*, 2023–2031. <https://doi.org/10.1002/bit.27342>.
44. Wang Y, Pan Y, Zhu T, Wang A, Lu Y, Lv L, Zhang K, Li Z. Enhanced performance and microbial community analysis of bioelectrochemical system integrated with bio-contact oxidation reactor for treatment of wastewater containing azo dye. *Sci. Total Environ.* **2018**, *634*, 616–627. <https://doi.org/10.1016/j.scitotenv.2018.03.346>.
45. Yang LH, Cheng HY, Ding YC, Su SG, Wang B, Zeng R, Sharif HMA, Wang AJ. Enhanced treatment of coal gasification wastewater in a membraneless sleeve-type bioelectrochemical system. *Bioelectrochemistry* **2019**, *129*, 154–161. <https://doi.org/10.1016/j.bioelechem.2019.05.013>.
